# Supplementary material
Source: Springer Nature journal article supplement (https://www.springermedizin.de/resource/supplementary/12943_2010_838_MOESM8_ESM.pdf/9551912)
Supplement: MOESM8 [file 9551912]

**A**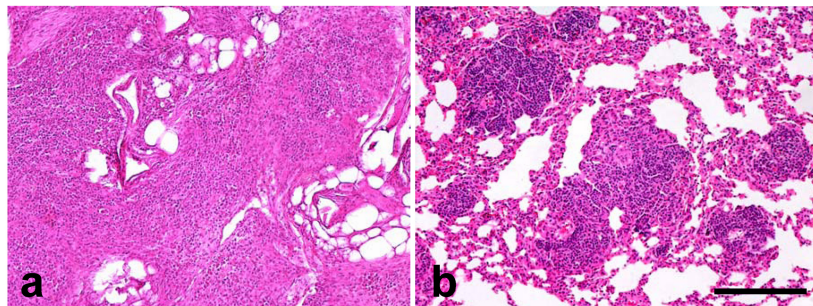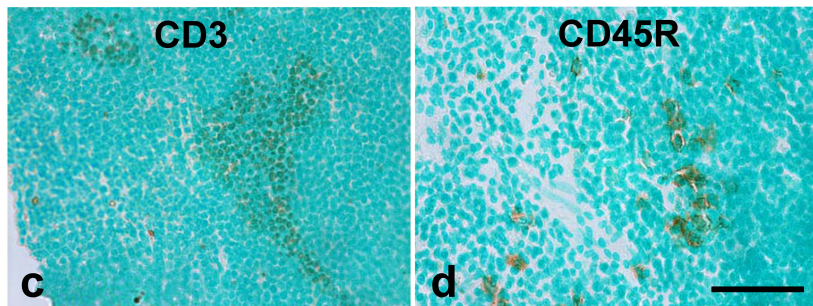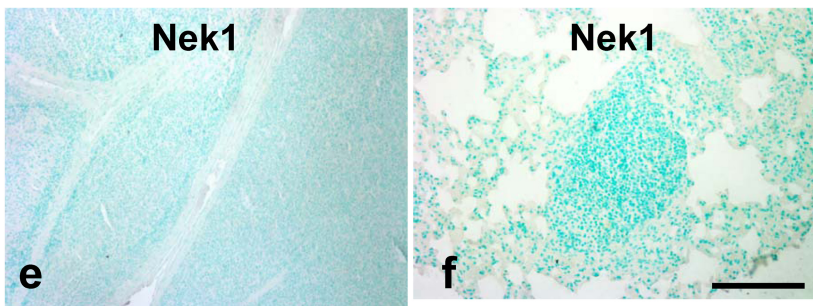**B**

|               | <i>Nek1</i> <sup>+/+</sup> | <i>Nek1</i> <sup>+/-</sup> |
|---------------|----------------------------|----------------------------|
| Lymphoma-free | 7                          | 4                          |
| Lymphoma      | 3                          | 32                         |
| Total         | 10                         | 36                         |
| B cell        | n/a                        | 9                          |
| T cell        | n/a                        | 2                          |
| B/T cell      | n/a                        | 4                          |
| Non B/ non T  | n/a                        | 17                         |
